# Supplementary material for: Ethical decision-making confidence scale for nurse leaders: Psychometric evaluation
Source: PubMed Central journal article supplement — Nurs Ethics. 2022 Mar 1;29(4):988–1002. doi: 10.1177/09697330211065847 (PMC9289993; doi:10.1177/09697330211065847), 2022-03-01
Supplement: sj-pdf-1-nej-10.1177_09697330211065847.pdf [file sj-pdf-1-nej-10.1177_09697330211065847.pdf]

## Supplementary Table 1

### Principal Component Analysis (PCA) by Countries

| German-speaking European Countries (AT-DE-CH)                                                                                                                         | Factor Loading   |       | Comm-<br>unality |
|-----------------------------------------------------------------------------------------------------------------------------------------------------------------------|------------------|-------|------------------|
|                                                                                                                                                                       | F1               | F2    |                  |
| 1. Recognize a genuine ethical dilemma in practice                                                                                                                    | .597             |       | .436             |
| 2. Make a sound ethical decision                                                                                                                                      | .709             |       | .518             |
| 3. Explain your ethical decisions using correct ethical terminology and language                                                                                      | .729             |       | .533             |
| 4. Provide a clear statement of the personal values that guide your EDM and practice                                                                                  | .816             |       | .575             |
| 5. Articulate legal guidelines related to complex ethical issues in patient care                                                                                      | .632             |       | .404             |
| 6. Articulate the difference between ethical dilemmas, moral distress, issues related to inter-professional collaboration and communication, difficult patients. etc. | .855             |       | .620             |
| 7. Articulate the definition of moral distress and provide an example in your practice                                                                                | .801             |       | .585             |
| 8. Identify ethical issues in complex patient care                                                                                                                    | .793             |       | .590             |
| 9. Apply ethical decision-making models or structured processes to complex clinical problems                                                                          | .572             |       | .545             |
| 10. Participate in and/or guide mediation related to complex clinical problems involving ethical dilemmas or moral distress                                           | .585             |       | .462             |
| 11. Recognize and manage moral distress in self and others                                                                                                            | .638             |       | .385             |
| 12. Role model collaborative problem solving in complex clinical problems involving ethical dilemmas or moral distress                                                | .562             |       | .455             |
| 13. Engage in preventative ethics initiatives to address the ethical environment in your practice area                                                                |                  | .704  | .596             |
| 14. Mentor others to develop ethical practice behaviors                                                                                                               |                  | .651  | .620             |
| 15. Address barriers to ethical practice through systems changes                                                                                                      |                  | .751  | .569             |
| 16. Use preventative ethics to decrease unit level moral distress                                                                                                     |                  | .696  | .577             |
| 17. Engage in health policy initiatives supporting social justice                                                                                                     |                  | .850  | .601             |
| 18. Provide leadership at the unit. Organizational, local, state and federal level for policy change initiatives to address social justice issues in health care      |                  | .827  | .564             |
| <b>Eigenvalue (rotated)</b>                                                                                                                                           | 7.50             | 2.14  |                  |
| <b>% of explanatory variance (cumulative, rotated)</b>                                                                                                                | 41.64            | 11.87 |                  |
| <b>Kaiser-Meyer-Olkin</b>                                                                                                                                             | 0.899            |       |                  |
| <b>Bartlett's (Chi<sup>2</sup>; p)</b>                                                                                                                                | 2,051.33; p<.001 |       |                  |
| USA                                                                                                                                                                   | Factor Loading   |       | Comm-<br>unality |
|                                                                                                                                                                       | F1               | F2    |                  |
| 1. Recognize a genuine ethical dilemma in practice                                                                                                                    | .840             |       | .713             |
| 2. Make a sound ethical decision                                                                                                                                      | .964             |       | .739             |
| 3. Explain your ethical decisions using correct ethical terminology and language                                                                                      | .688             |       | .738             |
| 4. Provide a clear statement of the personal values that guide your EDM and practice                                                                                  | .784             |       | .699             |
| 5. Articulate legal guidelines related to complex ethical issues in patient care                                                                                      | .512             |       | .558             |
| 6. Articulate the difference between ethical dilemmas, moral distress, issues related to inter-professional collaboration and communication, difficult patients. etc. | .507             |       | .696             |
| 7. Articulate the definition of moral distress and provide an example in your practice                                                                                | .613             |       | .702             |
| 8. Identify ethical issues in complex patient care                                                                                                                    | .751             |       | .730             |
| 9. Apply ethical decision-making models or structured processes to complex clinical problems #                                                                        | .405             | .463  | .718             |
| 10. Participate in and/or guide mediation related to complex clinical problems involving ethical dilemmas or moral distress                                           |                  | .844  | .600             |
| 11. Recognize and manage moral distress in self and others                                                                                                            | .513             |       | .634             |
| 12. Role model collaborative problem solving in complex clinical problems involving ethical dilemmas or moral distress #                                              |                  | .565  | .677             |
| 13. Engage in preventative ethics initiatives to address the ethical environment in your practice area                                                                |                  | .943  | .721             |
| 14. Mentor others to develop ethical practice behaviors #                                                                                                             |                  | .540  | .718             |
| 15. Address barriers to ethical practice through systems changes                                                                                                      |                  | .930  | .756             |
| 16. Use preventative ethics to decrease unit level moral distress §                                                                                                   |                  | .862  | .727             |
| 17. Engage in health policy initiatives supporting social justice                                                                                                     |                  | .724  | .489             |
| 18. Provide leadership at the unit, organizational, local, state and federal level for policy change initiatives to address social justice issues in health care §    |                  | .799  | .669             |
| <b>Eigenvalue (rotated)</b>                                                                                                                                           | 10.95            | 1.34  |                  |
| <b>% of explanatory variance (cumulative, rotated)</b>                                                                                                                | 60.84            | 7.42  |                  |
| <b>Kaiser-Meyer-Olkin</b>                                                                                                                                             | 0.912            |       |                  |
| <b>Bartlett's (Chi<sup>2</sup>; p)</b>                                                                                                                                | 1,448.96; p<.001 |       |                  |

Notes: promax rotation, wording of items was shortened in favor of layout features. # ambiguous factor cross-loading, factor loading based on muster matrix; AT Austria, DE Germany, CH Switzerland

## Supplementary Table 2

Overview of the Comparison of the Factor Structure Between Countries (German-speaking European countries vs. USA)

| Items                                                                                                                                                                 | Components by Country |                  |
|-----------------------------------------------------------------------------------------------------------------------------------------------------------------------|-----------------------|------------------|
|                                                                                                                                                                       | AT-DE-CH              | U.S.             |
| 1. Recognize a genuine ethical dilemma in practice                                                                                                                    | 1                     | 1                |
| 2. Make a sound ethical decision                                                                                                                                      | 1                     | 1                |
| 3. Explain your ethical decisions using correct ethical terminology and language                                                                                      | 1                     | 1                |
| 4. Provide a clear statement of the personal values that guide your EDM and practice                                                                                  | 1                     | 1                |
| 5. Articulate legal guidelines related to complex ethical issues in patient care                                                                                      | 1                     | 1                |
| 6. Articulate the difference between ethical dilemmas, moral distress, issues related to inter-professional collaboration and communication, difficult patients, etc. | 1                     | 1                |
| 7. Articulate the definition of moral distress and provide an example in your practice                                                                                | 1                     | 1                |
| 8. Identify ethical issues in complex patient care                                                                                                                    | 1                     | 1                |
| 9. Apply ethical decision-making models or structured processes to complex clinical problems                                                                          | 1                     | 1/2 <sup>§</sup> |
| 10. Participate in and/or guide mediation related to complex clinical problems involving ethical dilemmas or moral distress                                           | 1                     | 2                |
| 11. Recognize and manage moral distress in self and others                                                                                                            | 1                     | 1                |
| 12. Role model collaborative problem solving in complex clinical problems involving ethical dilemmas or moral distress                                                | 1                     | 2                |
| 13. Engage in preventative ethics initiatives to address the ethical environment in your practice area                                                                | 2                     | 2                |
| 14. Mentor others to develop ethical practice behaviors                                                                                                               | 2                     | 2                |
| 15. Address barriers to ethical practice through systems changes                                                                                                      | 2                     | 2                |
| 16. Use preventative ethics to decrease unit level moral distress                                                                                                     | 2                     | 2                |
| 17. Engage in health policy initiatives supporting social justice                                                                                                     | 2                     | 2                |
| 18. Provide leadership at the unit, organizational, local, state and federal level for policy change initiatives to address social justice issues in health care      | 2                     | 2                |

Notes: wording of items was shortened in favor of layout features; numbers refer to equivalent Factor 1 and 2 from single principal component analysis, <sup>§</sup> ambiguous cross-loading factor, highlighted items indicate discrepancies between countries and items, which were not included in the EDCM-subscales; AT Austria, DE Germany, CH Switzerland

### Supplementary Table 3

#### Reliability of EDMC Subscales by Country and for Total Sample

| EDMC-subscale items                                              | AT-DE-CH                               |                                           | U.S.                                   |                                           | Total Sample                           |                                           |
|------------------------------------------------------------------|----------------------------------------|-------------------------------------------|----------------------------------------|-------------------------------------------|----------------------------------------|-------------------------------------------|
| <b>Skill-based</b> confidence dimension<br>(skill-related)       | Corrected<br>item-scale<br>correlation | Cronbach $\alpha$ ,<br>if item<br>deleted | Corrected<br>item-scale<br>correlation | Cronbach $\alpha$ ,<br>if item<br>deleted | Corrected<br>item-scale<br>correlation | Cronbach $\alpha$ ,<br>if item<br>deleted |
| Item 1                                                           | 0.582                                  | 0.876                                     | 0.675                                  | 0.936                                     | 0.622                                  | 0.903                                     |
| Item 2                                                           | 0.652                                  | 0.870                                     | 0.755                                  | 0.931                                     | 0.706                                  | 0.897                                     |
| Item 3                                                           | 0.648                                  | 0.871                                     | 0.814                                  | 0.928                                     | 0.716                                  | 0.896                                     |
| Item 4                                                           | 0.673                                  | 0.869                                     | 0.771                                  | 0.930                                     | 0.711                                  | 0.896                                     |
| Item 5                                                           | 0.531                                  | 0.882                                     | 0.705                                  | 0.935                                     | 0.595                                  | 0.906                                     |
| Item 6                                                           | 0.721                                  | 0.864                                     | 0.803                                  | 0.928                                     | 0.754                                  | 0.893                                     |
| Item 7                                                           | 0.704                                  | 0.865                                     | 0.827                                  | 0.927                                     | 0.758                                  | 0.893                                     |
| Item 8                                                           | 0.702                                  | 0.866                                     | 0.797                                  | 0.929                                     | 0.739                                  | 0.894                                     |
| Item 11                                                          | 0.512                                  | 0.881                                     | 0.743                                  | 0.932                                     | 0.594                                  | 0.904                                     |
| Cronbach $\alpha$                                                | 0.884                                  |                                           | 0.938                                  |                                           | 0.908                                  |                                           |
| Standardized $\alpha$                                            | 0.886                                  |                                           | 0.938                                  |                                           | 0.909                                  |                                           |
| number of items                                                  | 9                                      |                                           | 9                                      |                                           | 9                                      |                                           |
| <b>Behavior-based</b> confidence dimension<br>(behavior-related) | Corrected<br>item-scale<br>correlation | Cronbach $\alpha$ ,<br>if item<br>deleted | Corrected<br>item-scale<br>correlation | Cronbach $\alpha$ ,<br>if item<br>deleted | Corrected<br>item-scale<br>correlation | Cronbach $\alpha$ ,<br>if item<br>deleted |
| Item 13                                                          | 0.671                                  | 0.820                                     | 0.721                                  | 0.900                                     | 0.681                                  | 0.852                                     |
| Item 14                                                          | 0.671                                  | 0.820                                     | 0.750                                  | 0.895                                     | 0.707                                  | 0.847                                     |
| Item 15                                                          | 0.642                                  | 0.826                                     | 0.850                                  | 0.881                                     | 0.715                                  | 0.847                                     |
| Item 16                                                          | 0.652                                  | 0.824                                     | 0.788                                  | 0.890                                     | 0.686                                  | 0.851                                     |
| Item 17                                                          | 0.610                                  | 0.832                                     | 0.657                                  | 0.909                                     | 0.639                                  | 0.859                                     |
| Item 18                                                          | 0.577                                  | 0.839                                     | 0.750                                  | 0.895                                     | 0.641                                  | 0.859                                     |
| Cronbach $\alpha$                                                | 0.851                                  |                                           | 0.911                                  |                                           | 0.874                                  |                                           |
| Standardized $\alpha$                                            | 0.852                                  |                                           | 0.911                                  |                                           | 0.875                                  |                                           |
| number of items                                                  | 6                                      |                                           | 6                                      |                                           | 6                                      |                                           |

Notes: item numbering refer to included items in the shared two-factor solution; AT Austria, DE Germany, CH Switzerland

## Supplementary Table 4

### Analysis of EDMC Items by Country and for Total Sample

|                                                                                                                                                                           | <b>AT-DE-CH<br/>(n=225)</b> | <b>U.S.<br/>(n=91)</b> | <b>Total<br/>(n=316)</b> |
|---------------------------------------------------------------------------------------------------------------------------------------------------------------------------|-----------------------------|------------------------|--------------------------|
| <b>Items</b>                                                                                                                                                              | M (SD)                      | M (SD)                 | M (SD)                   |
| 1. Recognize a genuine ethical dilemma in practice **                                                                                                                     | 4.0 (0.7)                   | 4.2 (0.7)              | 4.0 (0.7)                |
| 2. Make a sound ethical decision ***                                                                                                                                      | 3.4 (0.7)                   | 4.0 (0.7)              | 3.6 (0.8)                |
| 3. Explain your ethical decisions using correct ethical terminology and language ***                                                                                      | 3.1 (0.9)                   | 3.6 (0.8)              | 3.2 (0.9)                |
| 4. Provide a clear statement of the personal values that guide your EDM and practice **                                                                                   | 3.7 (0.8)                   | 4.0 (0.9)              | 3.8 (0.8)                |
| 5. Articulate legal guidelines related to complex ethical issues in patient care **                                                                                       | 3.3 (0.9)                   | 3.6 (0.9)              | 3.4 (0.9)                |
| 6. Articulate the difference between ethical dilemmas, moral distress, issues related to inter-professional collaboration and communication, difficult patients, etc. *** | 3.2 (0.9)                   | 3.6 (0.8)              | 3.4 (0.9)                |
| 7. Articulate the definition of moral distress and provide an example in your practice***                                                                                 | 3.1 (0.9)                   | 3.7 (0.9)              | 3.3 (0.9)                |
| 8. Identify ethical issues in complex patient care **                                                                                                                     | 3.6 (0.8)                   | 3.9 (0.8)              | 3.7 (0.8)                |
| 9. Apply ethical decision-making models or structured processes to complex clinical problems ***                                                                          | 3.1 (0.9)                   | 3.5 (0.9)              | 3.2 (0.9)                |
| 10. Participate in and/or guide mediation related to complex clinical problems involving ethical dilemmas or moral distress ***                                           | 3.0 (1.0)                   | 3.4 (0.9)              | 3.1 (1.0)                |
| 11. Recognize and manage moral distress in self and others *                                                                                                              | 3.5 (0.7)                   | 3.7 (0.8)              | 3.6 (0.8)                |
| 12. Role model collaborative problem solving in complex clinical problems involving ethical dilemmas or moral distress                                                    | 3.6 (0.7)                   | 3.5 (0.9)              | 3.7 (0.8)                |
| 13. Engage in preventative ethics initiatives to address the ethical environment in your practice area                                                                    | 3.3 (1.0)                   | 3.5 (0.9)              | 3.4 (1.0)                |
| 14. Mentor others to develop ethical practice behaviors ***                                                                                                               | 3.2 (1.0)                   | 3.7 (0.9)              | 3.4 (1.0)                |
| 15. Address barriers to ethical practice through systems changes ***                                                                                                      | 3.1 (0.9)                   | 3.6 (0.9)              | 3.2 (0.9)                |
| 16. Use preventative ethics to decrease unit level moral distress                                                                                                         | 3.2 (0.9)                   | 3.4 (0.8)              | 3.3 (0.9)                |
| 17. Engage in health policy initiatives supporting social justice ***                                                                                                     | 3.1 (1.0)                   | 3.6 (0.9)              | 3.3 (1.0)                |
| 18. Provide leadership at the unit, organizational, local, state and federal level for policy change initiatives to address social justice issues in health care ***      | 2.8 (1.0)                   | 3.5 (0.9)              | 3.0 (1.0)                |

Notes: n sample size, M Mean, SD Standard Deviation, \*  $p < 0.05$ , \*\*  $p < 0.01$ , \*\*\*  $p < 0.001$  (Student T-test for independent samples), item values: 1-very low, 2-low, 3- moderate, 4-high, 5- very high; highlighted items indicate items which were not included in EDMC-subcales; AT Austria, DE Germany, CH Switzerland
